# Supplementary material
Source: PubMed Central journal article supplement (PMC3326191)

## Supplemental Information

Ms. Title: **Keratin 16 null mice develop palmoplantar keratoderma, a hallmark feature of pachyonychia congenita and related disorders**

Authors: Juliane C. Lessard and Pierre A. Coulombe  
Bloomberg School of Public Health & School of Medicine,  
Johns Hopkins University

Content: Supplemental Experimental Procedures  
Supplemental Figure Legends S1-S3  
Supplemental Figures S1-S3

### **Supplemental Experimental Procedures**

#### *Protein extraction and Western Blotting*

Dorsal tongue epithelium was isolated and total protein extracted in RIPA buffer. Equal amounts of protein were separated on a 10% SDS-PAGE gel, transferred to nitrocellulose membranes, blocked in 5% milk in TBS-T, and incubated overnight in primary antibody solution (5% milk in TBS-T). After rinsing with TBS-T, membranes were incubated with secondary antibody and developed with the PICO/FEMTO kit (Thermo Scientific, Rockford, IL) according to the

manufacturer's protocol. Images were collected using a FluorChemQ system (Alpha Innotech).

Antibodies used in this study: Krt17 (1:5000; McGowan and Coulombe, 1998), Krt5 (1:2000; Covance, Princeton, NJ), alpha-tubulin (1:5000; Sigma, St. Louis, MO), Goat-anti-rabbit HRP and Goat-anti-mouse HRP (1:2000; Sigma, St. Louis, MO).

#### *Transmission Electron Microscopy*

Tongues from newborn pups were fixed in 2% formaldehyde/2% glutaraldehyde in 0.1M cacodylate buffer pH 7.4 overnight at 4°C, postfixed in osmium tetroxide, counterstained with uranyl acetate, and embedded in epoxy resin as previously described (Paladini and Coulombe, 1998). Thin sections were cut and examined using a Hitachi HU-12A transmission electron microscope.

#### *References:*

1. McGowan KM, Coulombe PA (1998) Onset of keratin 17 expression coincides with the definition of major epithelial lineages during skin development. *J Cell Biol* 143:469-486.
2. Paladini RD, Coulombe PA (1998) Directed expression of keratin 16 to the progenitor basal cells of transgenic mouse skin delays skin maturation. *J Cell Biol* 142:1035-1051.

## Supplemental Figure Legends

### Supplemental Figure S1

(a) *Krt16*<sup>-/-</sup> mice are born at approximately Mendelian ratios. At birth, all genotype are visually indistinguishable. (b) Toluidine Blue dye exclusion assays show no gross epidermal barrier defects in newborn *Krt16*<sup>-/-</sup> mice. (c) *Krt16*<sup>-/-</sup> pups at P0 weigh less than their littermates. Asterisk indicates a p-value < 0.03, Student's T-test.

### Supplemental Figure S2

(a) H&E stained cross-sections of tongues from 4-month-old mice. Note the increased thickness and altered papilla architecture in *Krt16*<sup>-/-</sup>. Scale bar, 50µm. (b) Transmission electron microscopy at P0 reveals early signs of cell lysis in the anterior column in a subset of *Krt16*<sup>-/-</sup> filiform papillae (asterisk). AC = anterior column, BC = buttress column, PC = posterior column. Control image: 3000x magnification, *Krt16*<sup>-/-</sup> image: 2000x magnification.

### Supplemental Figure S3

(a) Occasionally, generalized hyperkeratosis (black arrowheads) is observed in 3-week-old *Krt16*<sup>-/-</sup> front paws. At this point, there is no evidence of PPK formation. (b) Nail morphology is normal in adult *Krt16*<sup>-/-</sup> mice. nb = nail bed. Scale bar, 100µm. (c) TUNEL staining reveals the absence of apoptosis in both

established *Krt16*<sup>-/-</sup> front paw calluses and control tissue. DNase I digested positive control tissue from the same experiment is shown for comparison. The dotted line represents the epidermal/dermal junction. Scale bar, 50µm. **(d)** *Krt16*<sup>-/-</sup> mice spent more time resting and less time walking than control animals (experimental time frame of 30 min). Asterisks indicate a p-value < 0.002, Student's T-test.

**a**

| Genotype                   | E18.5 (total) | %  | Overall (total) | %  |
|----------------------------|---------------|----|-----------------|----|
| WT                         | 39 (114)      | 34 | 68 (236)        | 29 |
| <i>Krt16<sup>+/-</sup></i> | 55 (114)      | 48 | 121 (236)       | 51 |
| <i>Krt16<sup>-/-</sup></i> | 20 (114)      | 18 | 47 (236)        | 20 |

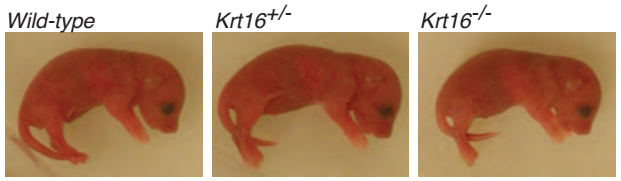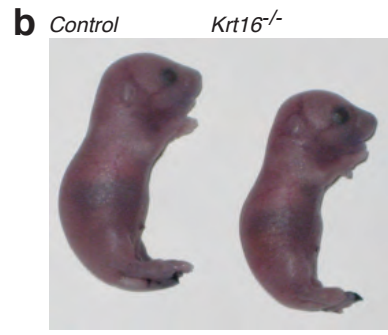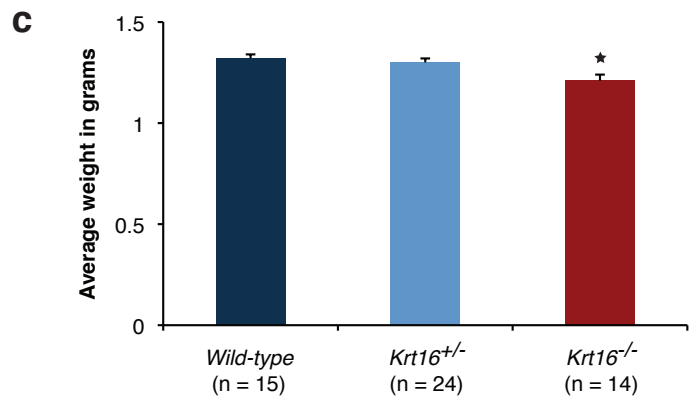

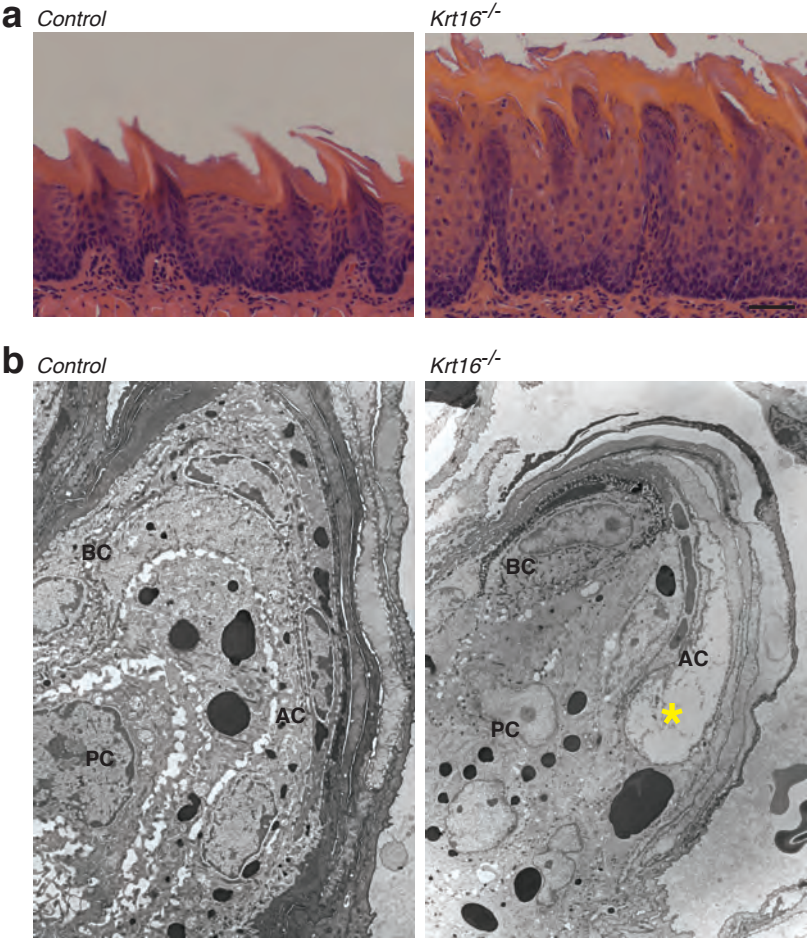

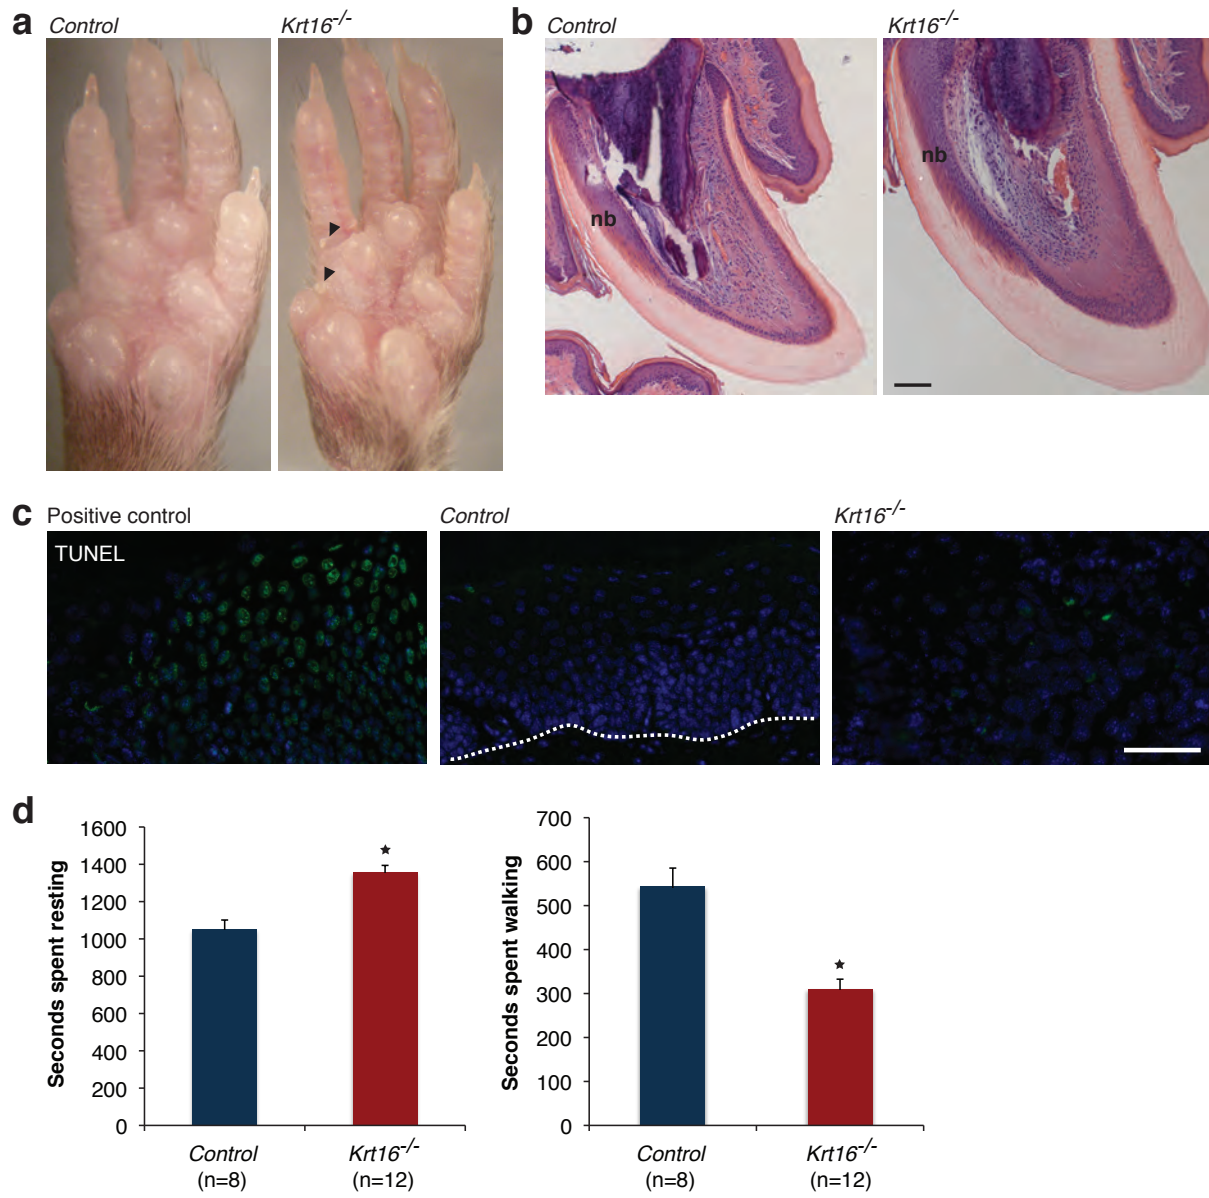

Supplement: NIHMS346163-supplement-supplement_1.pdf [file NIHMS346163-supplement-supplement_1.pdf]
